# Supplementary material for: Serological Evidence for Circulation of Influenza D Virus in the Ovine Population in Italy
Source: MDPI journal article supplement (doi:10.3390/pathogens13020162), 2024-02-11
Supplement: s1 [file s1]

**Table S1:** Average viral titers obtained using influenza D/bovine/Oklahoma/660/2013 (D/660) and D/swine/Italy/199724/2015 (D/OK) strains by haemagglutination inhibition (HI) and/or virus neutralization (VN) assays

| Sample | Sheep Herd | Prefecture | HI    |      | VN    |      |
|--------|------------|------------|-------|------|-------|------|
|        |            |            | D/660 | D/OK | D/660 | D/OK |
| 1      | A          | RG         | 5     | 5    | 20    | 5    |
| 2      | A          | RG         | 5     | 5    | 20    | 5    |
| 3      | A          | RG         | 5     | 5    | 20    | 5    |
| 4      | A          | RG         | 5     | 5    | 20    | 5    |
| 5      | A          | RG         | 5     | 5    | 20    | 5    |
| 6      | A          | RG         | 5     | 5    | 28    | 5    |
| 7      | A          | RG         | 5     | 5    | 5     | 5    |
| 8      | A          | RG         | 5     | 5    | 20    | 5    |
| 9      | A          | RG         | 5     | 5    | 40    | 5    |
| 10     | A          | RG         | 5     | 5    | 20    | 20   |
| 11     | A          | RG         | 5     | 5    | 5     | 5    |
| 12     | A          | RG         | 5     | 5    | 14    | 5    |
| 13     | A          | RG         | 5     | 5    | 5     | 5    |
| 14     | A          | RG         | 5     | 5    | 20    | 5    |
| 15     | A          | RG         | 5     | 5    | 20    | 28   |
| 16     | A          | RG         | 5     | 5    | 20    | 5    |
| 17     | A          | RG         | 5     | 5    | 5     | 5    |
| 18     | A          | RG         | 5     | 5    | 5     | 5    |
| 19     | A          | RG         | 5     | 5    | 10    | 5    |
| 20     | A          | RG         | 5     | 5    | 20    | 5    |
| 21     | B          | SR         | 5     | 5    | 14    | 5    |
| 22     | B          | SR         | 5     | 5    | 5     | 5    |
| 23     | B          | SR         | 5     | 5    | 10    | 5    |
| 24     | B          | SR         | 5     | 5    | 40    | 20   |
| 25     | B          | SR         | 5     | 5    | 10    | 10   |
| 26     | B          | SR         | 5     | 5    | 14    | 20   |
| 27     | B          | SR         | 5     | 5    | 20    | 5    |
| 28     | B          | SR         | 5     | 5    | 40    | 5    |
| 29     | B          | SR         | 5     | 5    | 5     | 5    |
| 30     | B          | SR         | 5     | 10   | 10    | 28   |
| 31     | B          | SR         | 5     | 5    | 20    | 5    |
| 32     | B          | SR         | 10    | 5    | 40    | 5    |
| 33     | B          | SR         | 5     | 5    | 14    | 5    |
| 34     | B          | SR         | 5     | 5    | 20    | 5    |
| 35     | B          | SR         | 5     | 5    | 5     | 5    |
| 36     | B          | SR         | 5     | 5    | 20    | 40   |
| 37     | B          | SR         | 10    | 5    | 40    | 14   |
| 38     | B          | SR         | 5     | 5    | 5     | 5    |
| 39     | B          | SR         | 5     | 5    | 5     | 5    |
| 40     | B          | SR         | 28    | 5    | 80    | 5    |
| 41     | B          | SR         | 5     | 5    | 20    | 5    |
| 42     | B          | SR         | 5     | 5    | 40    | 28   |
| 43     | B          | SR         | 5     | 5    | 5     | 5    |

|    |   |    |    |    |     |    |
|----|---|----|----|----|-----|----|
| 44 | B | SR | 5  | 5  | 20  | 5  |
| 45 | B | SR | 5  | 5  | 20  | 5  |
| 46 | B | SR | 5  | 5  | 5   | 5  |
| 47 | B | SR | 5  | 5  | 28  | 5  |
| 48 | B | SR | 5  | 5  | 57  | 5  |
| 49 | B | SR | 5  | 5  | 14  | 5  |
| 50 | B | SR | 5  | 5  | 14  | 5  |
| 51 | B | SR | 5  | 5  | 10  | 5  |
| 52 | B | SR | 5  | 5  | 14  | 5  |
| 53 | B | SR | 5  | 5  | 28  | 5  |
| 54 | B | SR | 5  | 5  | 5   | 5  |
| 55 | B | SR | 5  | 5  | 5   | 5  |
| 56 | B | SR | 5  | 5  | 40  | 5  |
| 57 | B | SR | 5  | 5  | 20  | 5  |
| 58 | B | SR | 5  | 5  | 5   | 5  |
| 59 | B | SR | 5  | 5  | 20  | 5  |
| 60 | B | SR | 5  | 10 | 10  | 57 |
| 61 | B | SR | 5  | 5  | 20  | 5  |
| 62 | B | SR | 5  | 5  | 28  | 5  |
| 63 | B | SR | 5  | 5  | 5   | 5  |
| 64 | B | SR | 5  | 5  | 14  | 20 |
| 65 | B | SR | 5  | 5  | 5   | 5  |
| 66 | B | SR | 5  | 5  | 20  | 5  |
| 67 | B | SR | 5  | 5  | 10  | 5  |
| 68 | B | SR | 5  | 5  | 20  | 5  |
| 69 | B | SR | 5  | 5  | 14  | 5  |
| 70 | B | SR | 5  | 5  | 5   | 5  |
| 71 | B | SR | 5  | 5  | 14  | 5  |
| 72 | B | SR | 5  | 5  | 80  | 5  |
| 73 | B | SR | 5  | 5  | 160 | 5  |
| 74 | B | SR | 5  | 5  | 20  | 5  |
| 75 | B | SR | 5  | 5  | 40  | 5  |
| 76 | B | SR | 5  | 5  | 5   | 5  |
| 77 | B | SR | 5  | 5  | 28  | 5  |
| 78 | C | SR | 5  | 5  | 5   | 5  |
| 79 | C | SR | 5  | 5  | 40  | 5  |
| 80 | C | SR | 5  | 5  | 20  | 5  |
| 81 | C | SR | 5  | 5  | 28  | 5  |
| 82 | C | SR | 5  | 5  | 28  | 5  |
| 83 | C | SR | 5  | 5  | 80  | 5  |
| 84 | C | SR | 5  | 5  | 57  | 5  |
| 85 | A | RG | 5  | 5  | 20  | 5  |
| 86 | A | RG | 5  | 5  | 5   | 5  |
| 87 | A | RG | 20 | 5  | 80  | 20 |
| 88 | A | RG | 10 | 10 | 5   | 5  |
| 89 | A | RG | 20 | 5  | 40  | 5  |
| 90 | A | RG | 10 | 5  | 28  | 5  |
| 91 | A | RG | 10 | 5  | 5   | 5  |
| 92 | A | RG | 5  | 5  | 40  | 5  |

|     |   |    |    |    |     |     |
|-----|---|----|----|----|-----|-----|
| 93  | A | RG | 28 | 5  | 40  | 5   |
| 94  | A | RG | 40 | 20 | 57  | 226 |
| 95  | A | RG | 5  | 5  | 14  | 5   |
| 96  | A | RG | 5  | 5  | 5   | 5   |
| 97  | A | RG | 14 | 5  | 40  | 5   |
| 98  | A | RG | 10 | 10 | 28  | 40  |
| 99  | A | RG | 10 | 5  | 28  | 5   |
| 100 | A | RG | 5  | 5  | 5   | 5   |
| 101 | A | RG | 5  | 5  | 5   | 5   |
| 102 | A | RG | 10 | 40 | 5   | 113 |
| 103 | A | RG | 5  | 5  | 20  | 28  |
| 104 | A | RG | 5  | 5  | 57  | 5   |
| 105 | A | RG | 20 | 5  | 57  | 5   |
| 106 | A | RG | 5  | 5  | 28  | 5   |
| 107 | A | RG | 5  | 5  | 5   | 5   |
| 108 | A | RG | 5  | 5  | 5   | 5   |
| 109 | A | RG | 5  | 5  | 40  | 5   |
| 110 | A | RG | 5  | 5  | 5   | 5   |
| 111 | A | RG | 5  | 5  | 5   | 5   |
| 112 | A | RG | 5  | 5  | 5   | 5   |
| 113 | A | RG | 5  | 5  | 160 | 5   |
| 114 | A | RG | 5  | 5  | 5   | 5   |
| 115 | D | RG | 5  | 10 | 40  | 28  |
| 116 | D | RG | 5  | 5  | 80  | 5   |
| 117 | D | RG | 5  | 5  | 40  | 5   |
| 118 | D | RG | 5  | 5  | 5   | 5   |
| 119 | D | RG | 5  | 5  | 20  | 5   |
| 120 | D | RG | 5  | 5  | 5   | 5   |
| 121 | D | RG | 5  | 5  | 40  | 5   |
| 122 | D | RG | 5  | 5  | 40  | 5   |
| 123 | D | RG | 5  | 5  | 57  | 5   |
| 124 | D | RG | 5  | 5  | 5   | 5   |
| 125 | D | RG | 5  | 5  | 5   | 5   |
| 126 | D | RG | 5  | 5  | 5   | 5   |
| 127 | D | RG | 5  | 5  | 5   | 5   |
| 128 | D | RG | 5  | 5  | 5   | 5   |
| 129 | D | RG | 5  | 5  | 80  | 5   |
| 130 | D | RG | 5  | 5  | 5   | 5   |
| 131 | D | RG | 28 | 5  | 57  | 5   |
| 132 | D | RG | 5  | 5  | 5   | 5   |
| 133 | D | RG | 5  | 5  | 5   | 5   |
| 134 | D | RG | 5  | 5  | 5   | 5   |
| 135 | D | RG | 10 | 5  | 57  | 40  |
| 136 | D | RG | 10 | 5  | 57  | 14  |
| 137 | D | RG | 5  | 5  | 28  | 5   |
| 138 | D | RG | 5  | 5  | 5   | 5   |
| 139 | D | RG | 5  | 5  | 5   | 5   |
| 140 | D | RG | 14 | 5  | 40  | 5   |
| 141 | D | RG | 5  | 5  | 5   | 5   |

|     |   |    |    |   |     |    |
|-----|---|----|----|---|-----|----|
| 142 | D | RG | 5  | 5 | 57  | 5  |
| 143 | D | RG | 5  | 5 | 20  | 5  |
| 144 | D | RG | 5  | 5 | 14  | 5  |
| 145 | D | RG | 5  | 5 | 5   | 5  |
| 146 | D | RG | 5  | 5 | 5   | 5  |
| 147 | D | RG | 5  | 5 | 20  | 5  |
| 148 | D | RG | 5  | 5 | 5   | 5  |
| 149 | D | RG | 5  | 5 | 20  | 5  |
| 150 | D | RG | 5  | 5 | 80  | 5  |
| 151 | D | RG | 5  | 5 | 28  | 5  |
| 152 | D | RG | 5  | 5 | 5   | 5  |
| 153 | D | RG | 5  | 5 | 5   | 5  |
| 154 | D | RG | 5  | 5 | 5   | 5  |
| 155 | D | RG | 10 | 5 | 160 | 5  |
| 156 | D | RG | 5  | 5 | 40  | 5  |
| 157 | D | RG | 10 | 5 | 40  | 5  |
| 158 | D | RG | 5  | 5 | 5   | 5  |
| 159 | D | RG | 10 | 5 | 160 | 5  |
| 160 | D | RG | 5  | 5 | 5   | 5  |
| 161 | D | RG | 5  | 5 | 5   | 5  |
| 162 | D | RG | 5  | 5 | 5   | 5  |
| 163 | D | RG | 5  | 5 | 5   | 5  |
| 164 | D | RG | 5  | 5 | 28  | 5  |
| 165 | D | RG | 5  | 5 | 5   | 5  |
| 166 | D | RG | 5  | 5 | 5   | 5  |
| 167 | D | RG | 5  | 5 | 10  | 5  |
| 168 | D | RG | 5  | 5 | 28  | 5  |
| 169 | D | RG | 5  | 5 | 40  | 5  |
| 170 | D | RG | 5  | 5 | 160 | 5  |
| 171 | D | RG | 5  | 5 | 28  | 10 |
| 172 | D | RG | 5  | 5 | 40  | 5  |
| 173 | D | RG | 5  | 5 | 5   | 5  |
| 174 | D | RG | 5  | 5 | 28  | 5  |
| 175 | E | RG | 5  | 5 | 5   | 5  |
| 176 | E | RG | 5  | 5 | 20  | 5  |
| 177 | E | RG | 5  | 5 | 40  | 5  |
| 178 | E | RG | 5  | 5 | 5   | 5  |
| 179 | E | RG | 40 | 5 | 113 | 5  |
| 180 | E | RG | 20 | 5 | 113 | 5  |
| 181 | E | RG | 5  | 5 | 5   | 5  |
| 182 | E | RG | 5  | 5 | 5   | 5  |
| 183 | E | RG | 5  | 5 | 5   | 5  |
| 184 | E | RG | 28 | 5 | 226 | 5  |
| 185 | E | RG | 5  | 5 | 28  | 5  |
| 186 | E | RG | 14 | 5 | 28  | 40 |
| 187 | E | RG | 5  | 5 | 40  | 5  |
| 188 | E | RG | 5  | 5 | 20  | 5  |
| 189 | E | RG | 20 | 5 | 20  | 5  |
| 190 | E | RG | 20 | 5 | 160 | 5  |

|     |   |    |    |    |     |    |
|-----|---|----|----|----|-----|----|
| 191 | E | RG | 10 | 5  | 57  | 5  |
| 192 | E | RG | 5  | 5  | 40  | 5  |
| 193 | E | RG | 5  | 5  | 5   | 5  |
| 194 | E | RG | 10 | 5  | 57  | 5  |
| 195 | E | RG | 14 | 10 | 5   | 28 |
| 196 | E | RG | 20 | 5  | 57  | 5  |
| 197 | E | RG | 5  | 5  | 5   | 5  |
| 198 | E | RG | 5  | 5  | 5   | 5  |
| 199 | E | RG | 5  | 5  | 5   | 5  |
| 200 | E | RG | 5  | 5  | 5   | 5  |
| 201 | E | RG | 5  | 5  | 5   | 5  |
| 202 | E | RG | 10 | 5  | 80  | 5  |
| 203 | E | RG | 5  | 5  | 5   | 5  |
| 204 | E | RG | 20 | 10 | 160 | 28 |
| 205 | E | RG | 5  | 5  | 80  | 5  |
| 206 | E | RG | 5  | 5  | 5   | 5  |
| 207 | E | RG | 10 | 5  | 20  | 10 |
| 208 | E | RG | 14 | 5  | 20  | 5  |
| 209 | E | RG | 14 | 5  | 160 | 5  |
| 210 | E | RG | 5  | 5  | 5   | 5  |
| 211 | E | RG | 5  | 5  | 5   | 5  |
| 212 | E | RG | 5  | 10 | 28  | 40 |
| 213 | E | RG | 5  | 5  | 5   | 5  |
| 214 | E | RG | 5  | 5  | 5   | 5  |
| 215 | F | RG | 5  | 5  | 20  | 5  |
| 216 | F | RG | 10 | 5  | 20  | 5  |
| 217 | F | RG | 5  | 5  | 28  | 5  |
| 218 | F | RG | 5  | 5  | 5   | 5  |
| 219 | F | RG | 5  | 5  | 5   | 5  |
| 220 | F | RG | 5  | 5  | 5   | 5  |
| 221 | F | RG | 14 | 5  | 80  | 5  |
| 222 | F | RG | 10 | 5  | 80  | 5  |
| 223 | F | RG | 10 | 10 | 40  | 28 |
| 224 | F | RG | 20 | 10 | 40  | 40 |
| 225 | F | RG | 5  | 5  | 40  | 5  |
| 226 | F | RG | 10 | 5  | 40  | 5  |
| 227 | F | RG | 20 | 5  | 28  | 5  |
| 228 | F | RG | 5  | 5  | 5   | 5  |
| 229 | F | RG | 5  | 5  | 5   | 5  |
| 230 | F | RG | 5  | 5  | 5   | 5  |
| 231 | F | RG | 5  | 5  | 5   | 5  |
| 232 | F | RG | 5  | 5  | 5   | 5  |
| 233 | F | RG | 5  | 5  | 57  | 5  |
| 234 | F | RG | 5  | 5  | 5   | 5  |
| 235 | F | RG | 5  | 5  | 5   | 5  |
| 236 | F | RG | 5  | 5  | 5   | 5  |
| 237 | F | RG | 5  | 5  | 5   | 5  |
| 238 | F | RG | 5  | 5  | 5   | 5  |
| 239 | F | RG | 5  | 5  | 5   | 5  |

|     |   |    |    |    |    |    |
|-----|---|----|----|----|----|----|
| 240 | F | RG | 5  | 5  | 5  | 5  |
| 241 | F | RG | 5  | 5  | 14 | 14 |
| 242 | F | RG | 5  | 5  | 5  | 5  |
| 243 | F | RG | 5  | 5  | 5  | 5  |
| 244 | F | RG | 10 | 5  | 40 | 14 |
| 245 | F | RG | 5  | 5  | 5  | 5  |
| 246 | F | RG | 5  | 5  | 5  | 5  |
| 247 | F | RG | 5  | 5  | 5  | 5  |
| 248 | F | RG | 40 | 5  | 80 | 5  |
| 249 | F | RG | 10 | 5  | 80 | 5  |
| 250 | F | RG | 5  | 5  | 5  | 5  |
| 251 | F | RG | 5  | 5  | 5  | 5  |
| 252 | F | RG | 20 | 5  | 40 | 5  |
| 253 | F | RG | 5  | 5  | 5  | 5  |
| 254 | F | RG | 5  | 5  | 5  | 5  |
| 255 | F | RG | 5  | 5  | 5  | 5  |
| 256 | F | RG | 5  | 5  | 5  | 5  |
| 257 | F | RG | 5  | 5  | 5  | 5  |
| 258 | D | RG | 10 | 5  | 40 | 5  |
| 259 | D | RG | 5  | 5  | 5  | 5  |
| 260 | D | RG | 5  | 5  | 5  | 5  |
| 261 | D | RG | 5  | 5  | 5  | 5  |
| 262 | D | RG | 5  | 5  | 20 | 5  |
| 263 | G | SR | 5  | 5  | 28 | 5  |
| 264 | G | SR | 5  | 5  | 40 | 5  |
| 265 | G | SR | 5  | 5  | 5  | 5  |
| 266 | G | SR | 5  | 10 | 10 | 40 |
| 267 | G | SR | 5  | 5  | 5  | 5  |
| 268 | G | SR | 5  | 5  | 5  | 5  |
| 269 | G | SR | 5  | 5  | 40 | 5  |
| 270 | G | SR | 5  | 5  | 40 | 10 |
| 271 | G | SR | 5  | 5  | 5  | 5  |
| 272 | G | SR | 5  | 5  | 5  | 5  |
| 273 | G | SR | 5  | 5  | 5  | 5  |
| 274 | G | SR | 20 | 5  | 40 | 5  |
| 275 | G | SR | 5  | 5  | 5  | 5  |
| 276 | G | SR | 5  | 5  | 5  | 5  |
| 277 | G | SR | 5  | 5  | 14 | 5  |
| 278 | G | SR | 10 | 20 | 40 | 14 |
| 279 | G | SR | 5  | 5  | 40 | 20 |
| 280 | G | SR | 5  | 5  | 5  | 5  |
| 281 | G | SR | 5  | 5  | 5  | 5  |
| 282 | G | SR | 5  | 5  | 20 | 5  |
| 283 | G | SR | 5  | 5  | 80 | 5  |
| 284 | G | SR | 40 | 10 | 57 | 10 |
| 285 | G | SR | 5  | 10 | 20 | 20 |
| 286 | G | SR | 5  | 5  | 20 | 5  |
| 287 | G | SR | 5  | 5  | 20 | 5  |
| 288 | G | SR | 5  | 5  | 5  | 5  |

|     |   |    |    |    |     |     |
|-----|---|----|----|----|-----|-----|
| 289 | G | SR | 5  | 5  | 5   | 5   |
| 290 | G | SR | 20 | 40 | 160 | 160 |
| 291 | G | SR | 5  | 5  | 5   | 5   |
| 292 | G | SR | 5  | 5  | 5   | 5   |
| 293 | G | SR | 5  | 5  | 5   | 5   |
| 294 | G | SR | 5  | 5  | 40  | 5   |
| 295 | G | SR | 5  | 5  | 5   | 5   |
| 296 | G | SR | 5  | 5  | 5   | 5   |
| 297 | G | SR | 5  | 5  | 5   | 5   |
| 298 | G | SR | 10 | 5  | 40  | 5   |
| 299 | G | SR | 5  | 5  | 5   | 5   |
| 300 | G | SR | 5  | 5  | 5   | 5   |
| 301 | G | SR | 14 | 5  | 57  | 10  |
| 302 | G | SR | 5  | 5  | 20  | 5   |
| 303 | G | SR | 5  | 5  | 80  | 5   |
| 304 | G | SR | 10 | 5  | 40  | 5   |
| 305 | G | SR | 5  | 5  | 5   | 5   |
| 306 | G | SR | 5  | 5  | 5   | 5   |
| 307 | G | SR | 14 | 5  | 40  | 5   |
| 308 | G | SR | 5  | 5  | 5   | 5   |
| 309 | G | SR | 5  | 5  | 40  | 5   |
| 310 | G | SR | 14 | 5  | 80  | 5   |
| 311 | G | SR | 5  | 5  | 20  | 5   |
| 312 | G | SR | 5  | 5  | 14  | 5   |
| 313 | H | SR | 5  | 10 | 20  | 28  |
| 314 | H | SR | 5  | 5  | 28  | 5   |
| 315 | H | SR | 5  | 5  | 5   | 5   |
| 316 | H | SR | 5  | 5  | 5   | 5   |
| 317 | H | SR | 5  | 5  | 40  | 5   |
| 318 | H | SR | 5  | 5  | 14  | 5   |
| 319 | H | SR | 5  | 5  | 28  | 5   |
| 320 | H | SR | 5  | 5  | 5   | 5   |
| 321 | H | SR | 5  | 5  | 57  | 5   |
| 322 | H | SR | 5  | 14 | 28  | 28  |
| 323 | H | SR | 5  | 5  | 5   | 10  |
| 324 | H | SR | 5  | 5  | 40  | 20  |
| 325 | E | RG | 5  | 5  | 5   | 5   |
| 326 | E | RG | 5  | 5  | 5   | 5   |
| 327 | E | RG | 5  | 5  | 28  | 5   |
| 328 | E | RG | 5  | 5  | 20  | 5   |
| 329 | E | RG | 5  | 5  | 5   | 5   |
| 330 | E | RG | 5  | 5  | 20  | 5   |
| 331 | E | RG | 20 | 5  | 20  | 5   |
| 332 | E | RG | 5  | 5  | 40  | 14  |
| 333 | E | RG | 14 | 10 | 40  | 28  |
| 334 | E | RG | 5  | 5  | 5   | 5   |
| 335 | E | RG | 5  | 5  | 5   | 5   |
| 336 | E | RG | 14 | 10 | 80  | 28  |
| 337 | E | RG | 10 | 5  | 40  | 5   |

|     |   |    |    |    |     |     |
|-----|---|----|----|----|-----|-----|
| 338 | E | RG | 10 | 5  | 28  | 5   |
| 339 | E | RG | 5  | 5  | 5   | 5   |
| 340 | E | RG | 5  | 5  | 5   | 5   |
| 341 | E | RG | 20 | 5  | 57  | 5   |
| 342 | E | RG | 20 | 5  | 80  | 28  |
| 343 | E | RG | 5  | 5  | 160 | 5   |
| 344 | E | RG | 5  | 5  | 28  | 5   |
| 345 | E | RG | 5  | 5  | 14  | 5   |
| 346 | E | RG | 5  | 5  | 5   | 5   |
| 347 | E | RG | 5  | 5  | 20  | 5   |
| 348 | E | RG | 5  | 5  | 5   | 5   |
| 349 | I | RG | 5  | 5  | 40  | 5   |
| 350 | I | RG | 5  | 5  | 20  | 5   |
| 351 | I | RG | 10 | 5  | 5   | 5   |
| 352 | I | RG | 5  | 5  | 5   | 5   |
| 353 | I | RG | 5  | 5  | 28  | 10  |
| 354 | I | RG | 5  | 5  | 5   | 5   |
| 355 | I | RG | 10 | 5  | 28  | 5   |
| 356 | I | RG | 10 | 5  | 40  | 5   |
| 357 | I | RG | 5  | 10 | 5   | 113 |
| 358 | I | RG | 5  | 5  | 5   | 5   |
| 359 | I | RG | 5  | 5  | 40  | 5   |
| 360 | I | RG | 5  | 5  | 5   | 5   |
| 361 | I | RG | 20 | 5  | 40  | 5   |
| 362 | I | RG | 5  | 5  | 5   | 5   |
| 363 | I | RG | 5  | 5  | 5   | 5   |
| 364 | I | RG | 14 | 5  | 20  | 28  |
| 365 | I | RG | 20 | 5  | 40  | 28  |
| 366 | I | RG | 20 | 5  | 80  | 5   |
| 367 | I | RG | 5  | 5  | 5   | 5   |
| 368 | I | RG | 5  | 5  | 5   | 5   |
| 369 | I | RG | 80 | 5  | 226 | 5   |
| 370 | I | RG | 5  | 5  | 5   | 5   |
| 371 | I | RG | 5  | 5  | 20  | 5   |
| 372 | I | RG | 5  | 5  | 5   | 5   |
| 373 | I | RG | 5  | 5  | 5   | 5   |
| 374 | I | RG | 20 | 5  | 28  | 5   |
| 375 | I | RG | 5  | 5  | 5   | 5   |
| 376 | I | RG | 5  | 5  | 5   | 5   |
| 377 | I | RG | 20 | 5  | 40  | 5   |
| 378 | I | RG | 5  | 5  | 5   | 5   |
| 379 | I | RG | 5  | 5  | 5   | 5   |
| 380 | I | RG | 5  | 5  | 5   | 5   |
| 381 | I | RG | 5  | 5  | 20  | 5   |
| 382 | I | RG | 5  | 5  | 5   | 5   |
| 383 | I | RG | 5  | 5  | 5   | 5   |
| 384 | I | RG | 5  | 5  | 40  | 5   |
| 385 | I | RG | 5  | 5  | 20  | 5   |
| 386 | I | RG | 5  | 5  | 113 | 5   |



|     |   |    |     |    |     |     |
|-----|---|----|-----|----|-----|-----|
| 387 | I | RG | 5   | 5  | 5   | 5   |
| 388 | I | RG | 5   | 5  | 5   | 5   |
| 389 | I | RG | 20  | 5  | 40  | 28  |
| 390 | I | RG | 14  | 5  | 57  | 5   |
| 391 | I | RG | 10  | 5  | 40  | 5   |
| 392 | I | RG | 40  | 5  | 160 | 5   |
| 393 | I | RG | 5   | 5  | 5   | 5   |
| 394 | I | RG | 5   | 5  | 5   | 5   |
| 395 | I | RG | 5   | 5  | 5   | 5   |
| 396 | I | RG | 5   | 5  | 5   | 5   |
| 397 | I | RG | 5   | 5  | 20  | 5   |
| 398 | I | RG | 10  | 5  | 40  | 5   |
| 399 | I | RG | 5   | 5  | 40  | 5   |
| 400 | I | RG | 10  | 5  | 28  | 14  |
| 401 | I | RG | 5   | 5  | 5   | 5   |
| 402 | I | RG | 5   | 5  | 5   | 5   |
| 403 | I | RG | 40  | 5  | 160 | 20  |
| 404 | I | RG | 20  | 5  | 40  | 57  |
| 405 | I | RG | 20  | 5  | 40  | 5   |
| 406 | I | RG | 10  | 5  | 20  | 5   |
| 407 | I | RG | 5   | 5  | 5   | 5   |
| 408 | I | RG | 10  | 5  | 20  | 5   |
| 409 | I | RG | 28  | 5  | 40  | 5   |
| 410 | I | RG | 20  | 5  | 5   | 40  |
| 411 | I | RG | 20  | 5  | 40  | 40  |
| 412 | I | RG | 5   | 5  | 20  | 10  |
| 413 | I | RG | 5   | 5  | 5   | 5   |
| 414 | I | RG | 14  | 5  | 57  | 5   |
| 415 | I | RG | 10  | 5  | 20  | 14  |
| 416 | I | RG | 10  | 5  | 20  | 28  |
| 417 | I | RG | 40  | 5  | 80  | 28  |
| 418 | I | RG | 80  | 5  | 160 | 57  |
| 419 | G | SR | 5   | 5  | 5   | 5   |
| 420 | G | SR | 5   | 5  | 5   | 40  |
| 421 | G | SR | 5   | 5  | 28  | 5   |
| 422 | G | SR | 5   | 5  | 40  | 5   |
| 423 | G | SR | 5   | 5  | 5   | 5   |
| 424 | G | SR | 5   | 5  | 5   | 20  |
| 425 | G | SR | 10  | 5  | 80  | 20  |
| 426 | J | SR | 5   | 5  | 5   | 5   |
| 427 | J | SR | 5   | 5  | 5   | 5   |
| 428 | J | SR | 5   | 5  | 5   | 20  |
| 429 | J | SR | 5   | 5  | 5   | 20  |
| 430 | J | SR | 5   | 5  | 5   | 5   |
| 431 | J | SR | 20  | 40 | 453 | 453 |
| 432 | J | SR | 5   | 5  | 5   | 5   |
| 433 | J | SR | 20  | 5  | 14  | 28  |
| 434 | J | SR | 5   | 5  | 20  | 20  |
| 435 | J | SR | 160 | 5  | 320 | 40  |

|     |   |    |     |    |      |     |
|-----|---|----|-----|----|------|-----|
| 436 | J | SR | 40  | 10 | 160  | 80  |
| 437 | J | SR | 5   | 5  | 5    | 5   |
| 438 | J | SR | 5   | 5  | 5    | 5   |
| 439 | J | SR | 5   | 5  | 40   | 5   |
| 440 | J | SR | 5   | 5  | 5    | 5   |
| 441 | J | SR | 5   | 5  | 5    | 20  |
| 442 | J | SR | 5   | 5  | 20   | 5   |
| 443 | J | SR | 10  | 5  | 40   | 57  |
| 444 | J | SR | 28  | 5  | 160  | 40  |
| 445 | J | SR | 5   | 5  | 5    | 5   |
| 446 | J | SR | 5   | 5  | 5    | 5   |
| 447 | J | SR | 160 | 20 | 1280 | 320 |
| 448 | J | SR | 5   | 5  | 10   | 5   |
| 449 | J | SR | 5   | 5  | 5    | 5   |
| 450 | J | SR | 5   | 5  | 14   | 20  |
| 451 | J | SR | 20  | 5  | 113  | 113 |
| 452 | J | SR | 5   | 5  | 80   | 5   |
| 453 | J | SR | 14  | 5  | 5    | 5   |
| 454 | J | SR | 20  | 5  | 40   | 20  |
| 455 | J | SR | 5   | 5  | 5    | 5   |
| 456 | J | SR | 5   | 5  | 5    | 5   |
| 457 | J | SR | 10  | 5  | 20   | 5   |
| 458 | J | SR | 20  | 5  | 57   | 40  |
| 459 | J | SR | 5   | 5  | 5    | 5   |
| 460 | J | SR | 5   | 5  | 5    | 5   |
| 461 | J | SR | 5   | 5  | 40   | 20  |
| 462 | J | SR | 28  | 5  | 80   | 57  |
| 463 | J | SR | 20  | 10 | 113  | 113 |
| 464 | J | SR | 40  | 5  | 640  | 57  |
| 465 | J | SR | 57  | 5  | 160  | 57  |
| 466 | J | SR | 5   | 5  | 40   | 57  |
| 467 | J | SR | 14  | 5  | 80   | 57  |
| 468 | J | SR | 10  | 5  | 40   | 5   |
| 469 | J | SR | 14  | 5  | 80   | 20  |
| 470 | J | SR | 10  | 5  | 5    | 5   |
| 471 | K | RG | 5   | 5  | 5    | 5   |
| 472 | K | RG | 5   | 5  | 40   | 20  |
| 473 | K | RG | 5   | 5  | 5    | 5   |
| 474 | K | RG | 5   | 5  | 80   | 5   |
| 475 | K | RG | 5   | 5  | 20   | 5   |
| 476 | K | RG | 5   | 5  | 5    | 5   |
| 477 | K | RG | 5   | 5  | 20   | 40  |
| 478 | K | RG | 5   | 5  | 14   | 5   |
| 479 | K | RG | 10  | 5  | 40   | 40  |
| 480 | K | RG | 5   | 5  | 40   | 5   |
| 481 | K | RG | 20  | 5  | 57   | 20  |
| 482 | K | RG | 40  | 10 | 113  | 57  |
| 483 | K | RG | 10  | 5  | 57   | 5   |
| 484 | K | RG | 10  | 5  | 57   | 28  |

|     |   |    |    |    |     |    |
|-----|---|----|----|----|-----|----|
| 485 | K | RG | 10 | 5  | 5   | 5  |
| 486 | K | RG | 10 | 5  | 57  | 14 |
| 487 | K | RG | 20 | 5  | 40  | 40 |
| 488 | K | RG | 5  | 5  | 5   | 5  |
| 489 | K | RG | 10 | 5  | 40  | 5  |
| 490 | K | RG | 5  | 5  | 28  | 40 |
| 491 | K | RG | 5  | 5  | 10  | 10 |
| 492 | K | RG | 5  | 5  | 10  | 5  |
| 493 | K | RG | 20 | 5  | 57  | 80 |
| 494 | K | RG | 5  | 5  | 20  | 5  |
| 495 | K | RG | 5  | 5  | 5   | 5  |
| 496 | K | RG | 20 | 5  | 5   | 5  |
| 497 | K | RG | 10 | 5  | 40  | 5  |
| 498 | K | RG | 5  | 5  | 20  | 5  |
| 499 | K | RG | 5  | 5  | 10  | 5  |
| 500 | K | RG | 5  | 5  | 10  | 5  |
| 501 | K | RG | 10 | 5  | 14  | 5  |
| 502 | K | RG | 20 | 5  | 80  | 80 |
| 503 | K | RG | 20 | 5  | 80  | 5  |
| 504 | K | RG | 5  | 5  | 14  | 5  |
| 505 | K | RG | 5  | 5  | 10  | 5  |
| 506 | K | RG | 20 | 5  | 57  | 5  |
| 507 | K | RG | 5  | 5  | 20  | 5  |
| 508 | K | RG | 5  | 5  | 5   | 5  |
| 509 | K | RG | 5  | 5  | 5   | 5  |
| 510 | K | RG | 5  | 5  | 20  | 5  |
| 511 | K | RG | 20 | 5  | 57  | 40 |
| 512 | K | RG | 5  | 5  | 28  | 5  |
| 513 | K | RG | 5  | 5  | 80  | 5  |
| 514 | K | RG | 5  | 5  | 28  | 10 |
| 515 | K | RG | 20 | 5  | 40  | 57 |
| 516 | K | RG | 20 | 5  | 28  | 28 |
| 517 | K | RG | 5  | 5  | 113 | 5  |
| 518 | K | RG | 5  | 5  | 10  | 5  |
| 519 | K | RG | 10 | 5  | 80  | 5  |
| 520 | K | RG | 10 | 5  | 40  | 5  |
| 521 | L | SR | 5  | 5  | 5   | 5  |
| 522 | L | SR | 5  | 5  | 57  | 5  |
| 523 | L | SR | 20 | 5  | 80  | 28 |
| 524 | L | SR | 5  | 5  | 40  | 5  |
| 525 | L | SR | 20 | 5  | 453 | 40 |
| 526 | L | SR | 5  | 10 | 20  | 57 |
| 527 | L | SR | 10 | 5  | 57  | 5  |
| 528 | L | SR | 10 | 5  | 160 | 80 |
| 529 | L | SR | 5  | 5  | 14  | 20 |
| 530 | L | SR | 10 | 5  | 80  | 5  |
| 531 | M | RG | 28 | 5  | 226 | 20 |
| 532 | M | RG | 5  | 5  | 40  | 5  |
| 533 | M | RG | 5  | 5  | 20  | 5  |

|     |   |    |     |    |     |     |
|-----|---|----|-----|----|-----|-----|
| 534 | M | RG | 5   | 5  | 20  | 5   |
| 535 | M | RG | 5   | 5  | 10  | 5   |
| 536 | M | RG | 5   | 5  | 20  | 5   |
| 537 | M | RG | 5   | 5  | 5   | 5   |
| 538 | M | RG | 5   | 5  | 5   | 5   |
| 539 | M | RG | 20  | 5  | 57  | 5   |
| 540 | M | RG | 5   | 5  | 40  | 40  |
| 541 | M | RG | 5   | 5  | 5   | 5   |
| 542 | M | RG | 5   | 5  | 5   | 5   |
| 543 | M | RG | 5   | 5  | 5   | 5   |
| 544 | M | RG | 5   | 5  | 20  | 5   |
| 545 | M | RG | 5   | 5  | 5   | 5   |
| 546 | M | RG | 5   | 5  | 20  | 5   |
| 547 | M | RG | 5   | 5  | 5   | 20  |
| 548 | M | RG | 5   | 5  | 40  | 14  |
| 549 | M | RG | 5   | 5  | 14  | 5   |
| 550 | M | RG | 5   | 5  | 20  | 14  |
| 551 | N | SR | 10  | 5  | 40  | 5   |
| 552 | N | SR | 10  | 5  | 40  | 40  |
| 553 | N | SR | 5   | 5  | 20  | 5   |
| 554 | N | SR | 10  | 5  | 5   | 5   |
| 555 | N | SR | 5   | 5  | 5   | 5   |
| 556 | N | SR | 5   | 5  | 14  | 5   |
| 557 | N | SR | 40  | 5  | 320 | 40  |
| 558 | N | SR | 5   | 5  | 5   | 5   |
| 559 | N | SR | 5   | 5  | 5   | 5   |
| 560 | N | SR | 5   | 5  | 14  | 10  |
| 561 | N | SR | 5   | 5  | 40  | 20  |
| 562 | N | SR | 5   | 5  | 5   | 5   |
| 563 | N | SR | 10  | 5  | 40  | 28  |
| 564 | N | SR | 5   | 5  | 28  | 5   |
| 565 | N | SR | 5   | 5  | 5   | 5   |
| 566 | O | RG | 5   | 5  | 5   | 5   |
| 567 | O | RG | 160 | 20 | 320 | 160 |
| 568 | O | RG | 10  | 5  | 40  | 5   |
| 569 | O | RG | 20  | 5  | 57  | 5   |
| 570 | O | RG | 5   | 5  | 5   | 5   |
| 571 | O | RG | 80  | 40 | 453 | 905 |
| 572 | O | RG | 40  | 80 | 160 | 453 |
| 573 | O | RG | 20  | 5  | 113 | 5   |
| 574 | O | RG | 10  | 10 | 80  | 80  |
| 575 | O | RG | 5   | 5  | 40  | 20  |
| 576 | L | RG | 14  | 5  | 57  | 40  |
| 577 | L | RG | 5   | 5  | 80  | 5   |
| 578 | L | RG | 5   | 5  | 20  | 57  |
| 579 | L | RG | 5   | 5  | 5   | 5   |
| 580 | L | RG | 5   | 5  | 20  | 5   |
| 581 | L | RG | 5   | 5  | 28  | 5   |
| 582 | L | RG | 5   | 5  | 5   | 5   |

|     |   |    |    |    |    |     |
|-----|---|----|----|----|----|-----|
| 583 | L | RG | 5  | 5  | 5  | 5   |
| 584 | L | RG | 5  | 5  | 14 | 5   |
| 585 | L | RG | 5  | 5  | 20 | 5   |
| 586 | L | RG | 5  | 5  | 5  | 5   |
| 587 | L | RG | 10 | 5  | 20 | 5   |
| 588 | L | RG | 5  | 5  | 5  | 5   |
| 589 | L | RG | 5  | 5  | 5  | 20  |
| 590 | L | RG | 5  | 5  | 20 | 5   |
| 591 | L | RG | 5  | 10 | 5  | 160 |
| 592 | L | RG | 5  | 5  | 28 | 20  |
| 593 | L | RG | 5  | 5  | 20 | 5   |
| 594 | L | RG | 5  | 5  | 5  | 5   |
| 595 | L | RG | 5  | 5  | 5  | 5   |
| 596 | L | RG | 5  | 5  | 20 | 28  |
| 597 | L | RG | 5  | 5  | 40 | 5   |
| 598 | L | RG | 5  | 5  | 5  | 5   |
| 599 | L | RG | 5  | 5  | 5  | 5   |
| 600 | L | RG | 5  | 5  | 20 | 5   |

---
